# Supplementary material for: Prostacyclin synthase deficiency exacerbates inflammatory reactions in lipopolysaccharide-induced sepsis in vivo
Source: Research Square preprint supplement (doi:10.21203/rs.3.rs-3972516/v1), 2024-02-28
Supplement: Supplementary file 1 [file 131b899257e372d96f2f98be.xlsx]

## Sheet: Sheet1
Table 1. A list of primers used in quantitative RT-PCR
Gene	Forward Primer	Reverse Primer
Gapdh	5’-CATGGCCTTCCGTGTTCCTA-3’	5’-GCGGCACGTCAGATCCA-3’
Tnf	5’-CATCTTCTCAAAATTCGAGTGACAA-3’	5’-TGGGAGTAGACAAGGTACAACCC-3’
Il6	5’-GAGGATACCACTCCCAACAGACC-3’	5’-AAGTGCATCATCGTTGTTCATACA-3’
Ptgs1	5’-AGCACACTGCTGGTCATCAA-3’	5’-CAGCCACATGCAGAACATGAT-3’
Ptgs2	5’-CAGCCAGGCAGCAAATCC-3’	5’-ACATTCCCCACGGTTTTGAC-3’
Ptgis	5’-CCCAGAAGGACCCAGAAATCTAC-3’	5’-TGGGTTCAAGAATCGGTTGTATT-3’
Mpo	5’-ACAAGGAGCGGAGAGAAAGC-3’	5’-GATAATCAGCGGCCCTCACA-3’
Cxcl1	5’-GCAGACCATGGCTGGGATT-3’	5’-CCTGAGGGCAACACCTTCAA-3’
